# Supplementary figures and images for: Cell Therapy With Mesenchymal Stem Cells Induces an Innate Immune Memory Response That Attenuates Experimental Colitis in the Long Term
Source: PubMed Central journal article supplement — J Crohns Colitis. 2020 Apr 22;14(10):1424–35. doi: 10.1093/ecco-jcc/jjaa079 (PMC7533896; doi:10.1093/ecco-jcc/jjaa079), 2020-04-22

**A**

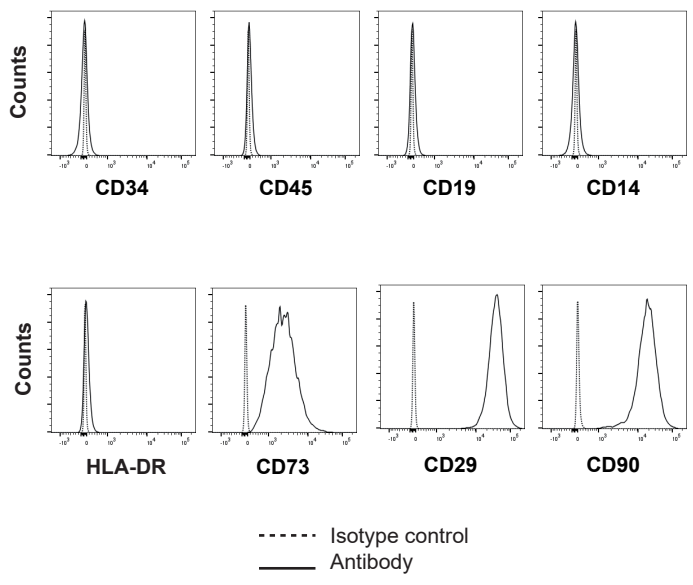

**B**

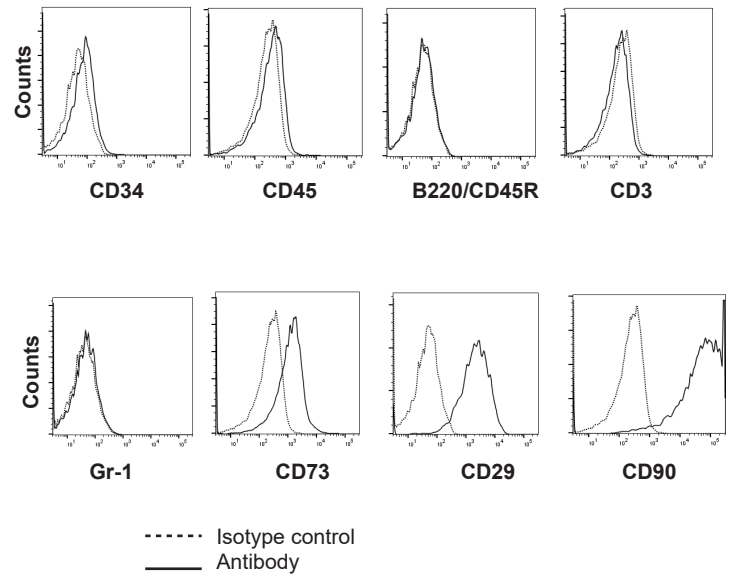

**C**

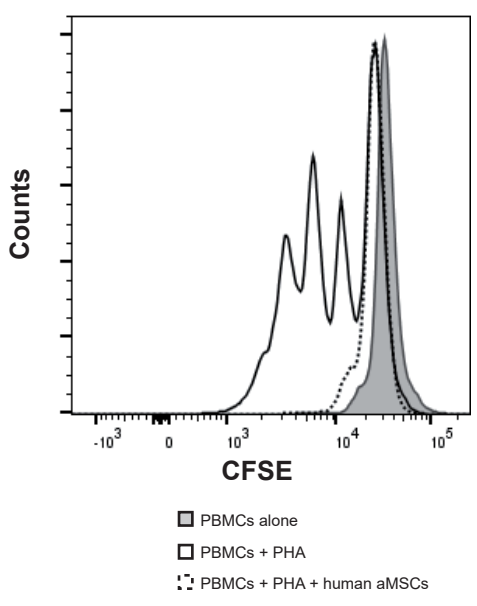

**D**

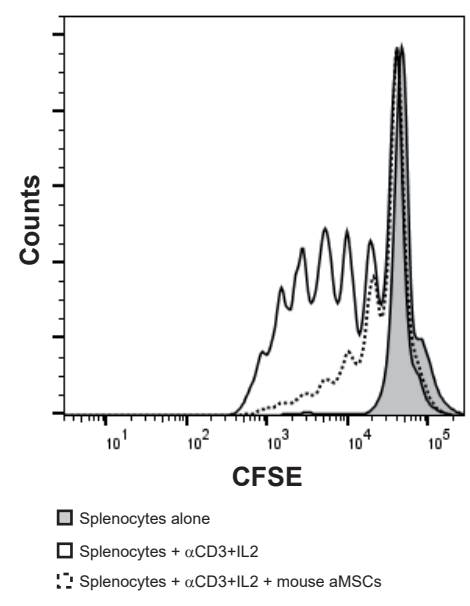

**E**

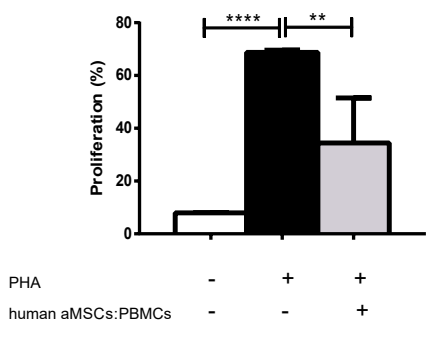

**F**

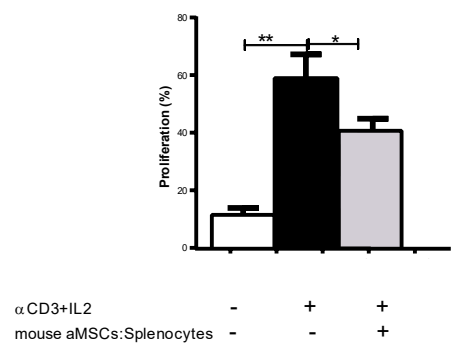

Supplement: jjaa079_suppl_supplementary_figure_1.pdf [file jjaa079_suppl_supplementary_figure_1.pdf]

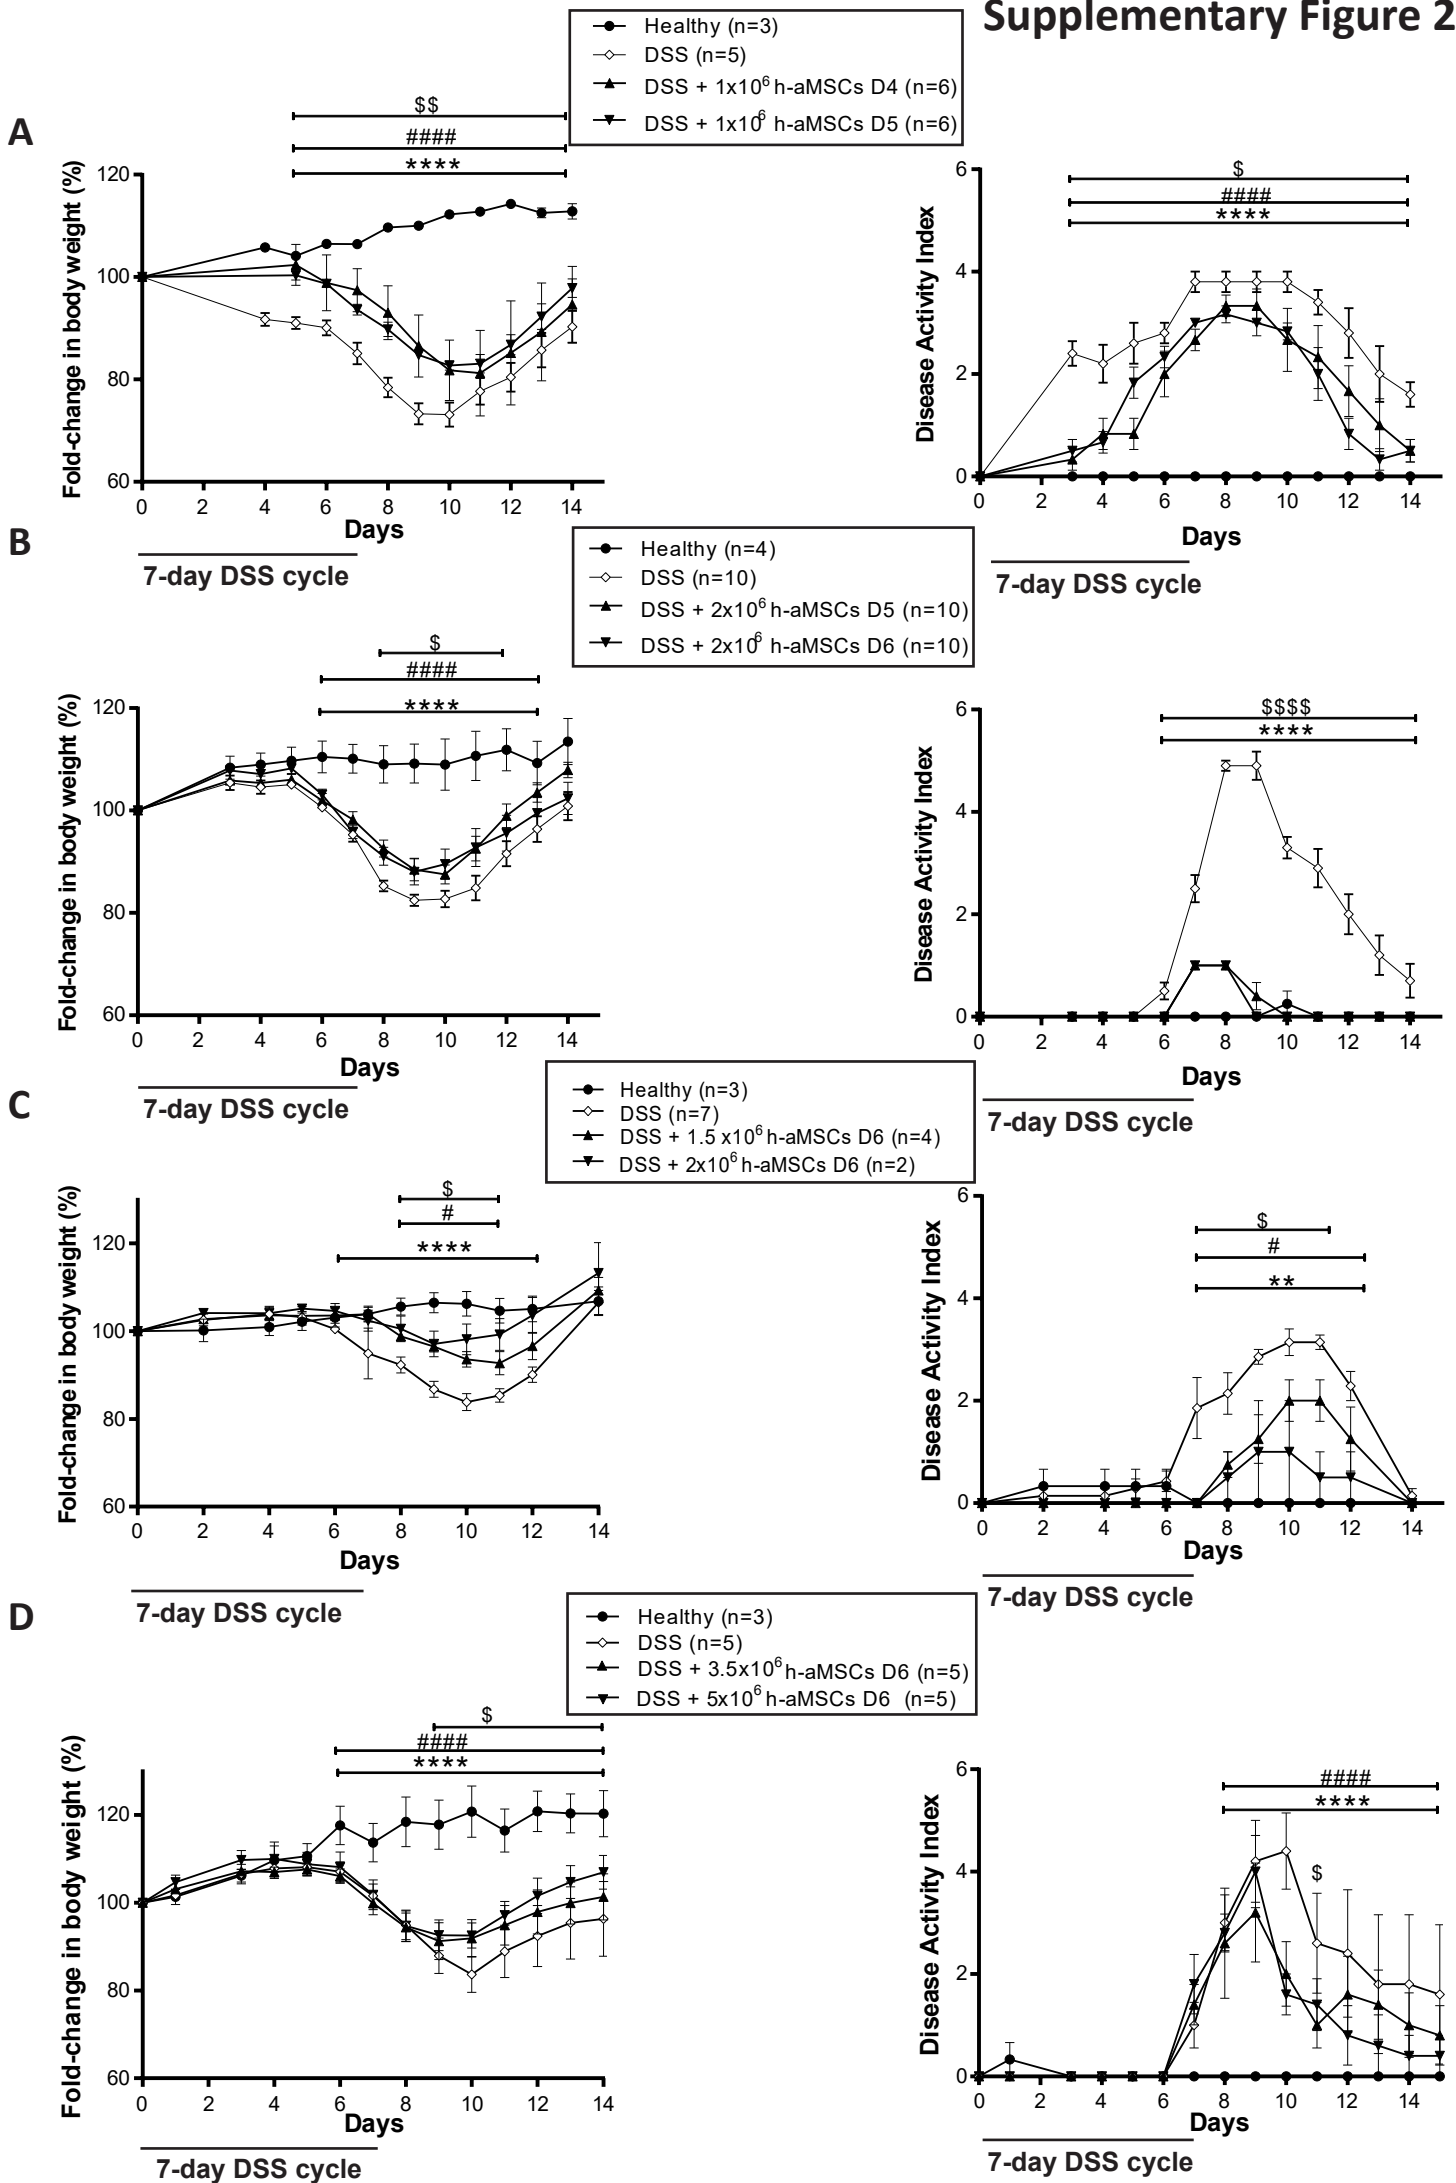

Supplement: jjaa079_suppl_supplementary_figure_2.pdf [file jjaa079_suppl_supplementary_figure_2.pdf]

# Supplementary Figure 3

**A**

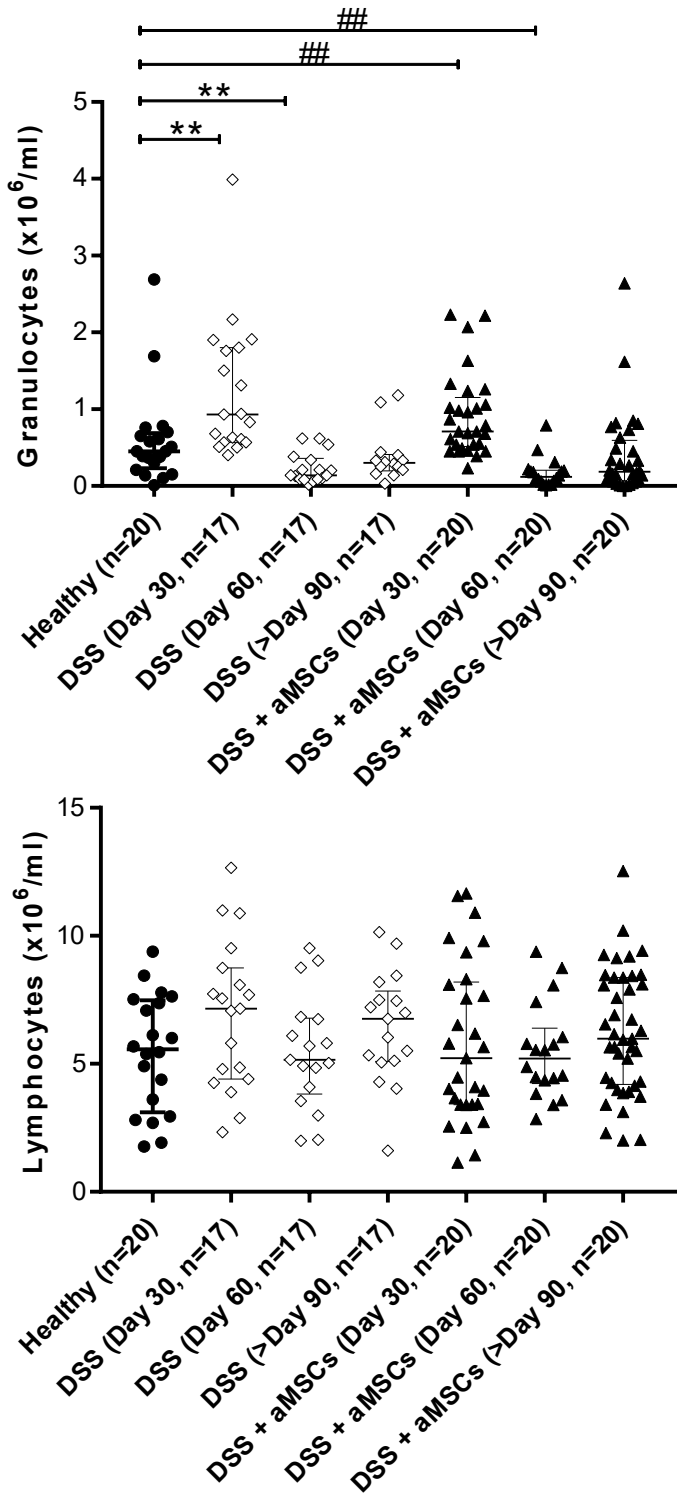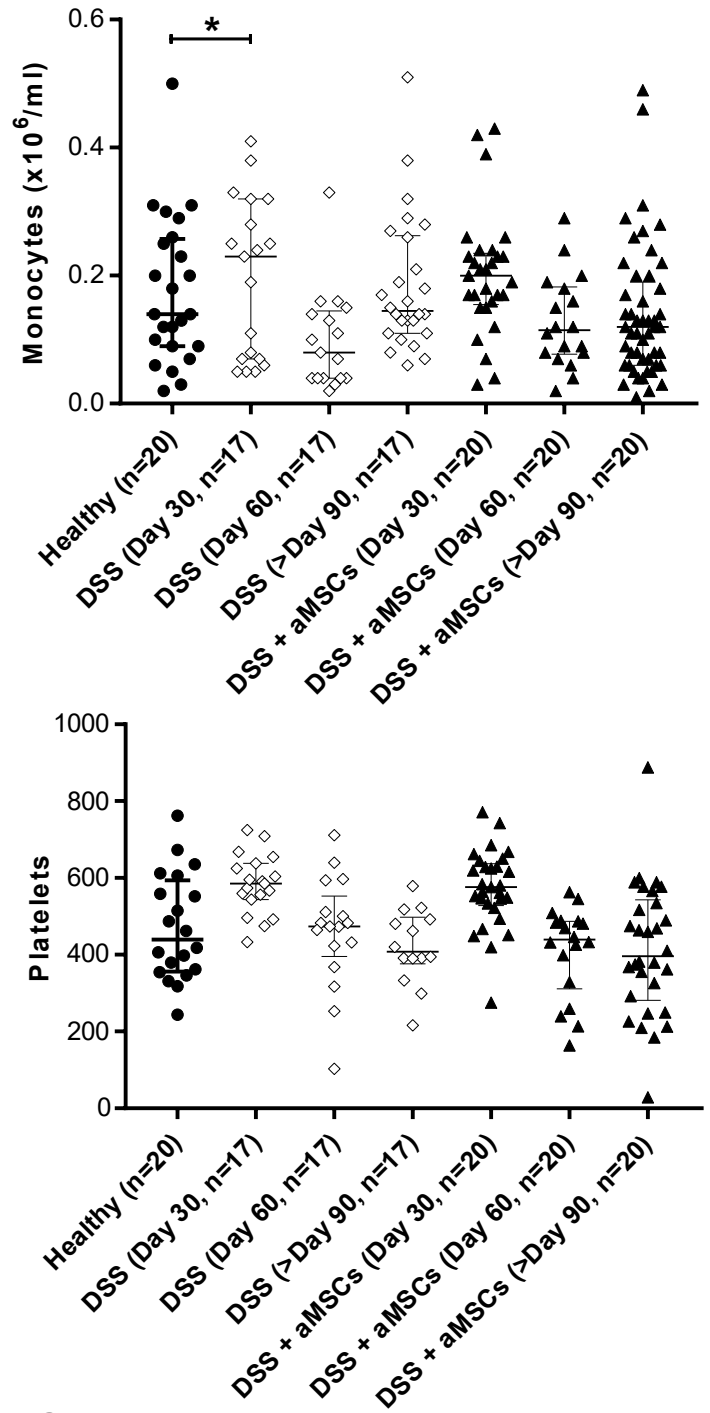

**B**

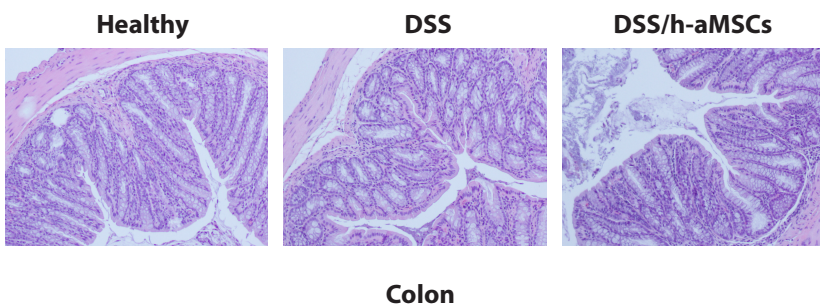

**C**

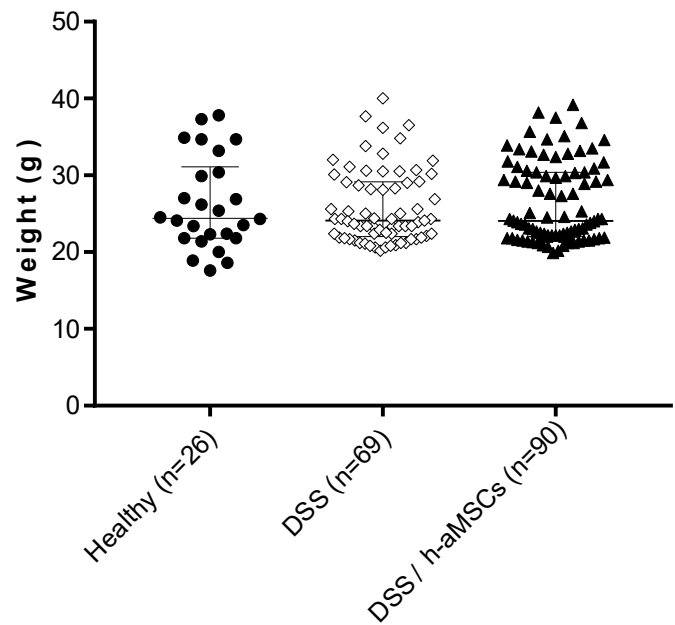

Supplement: jjaa079_suppl_supplementary_figure_3.pdf [file jjaa079_suppl_supplementary_figure_3.pdf]

A

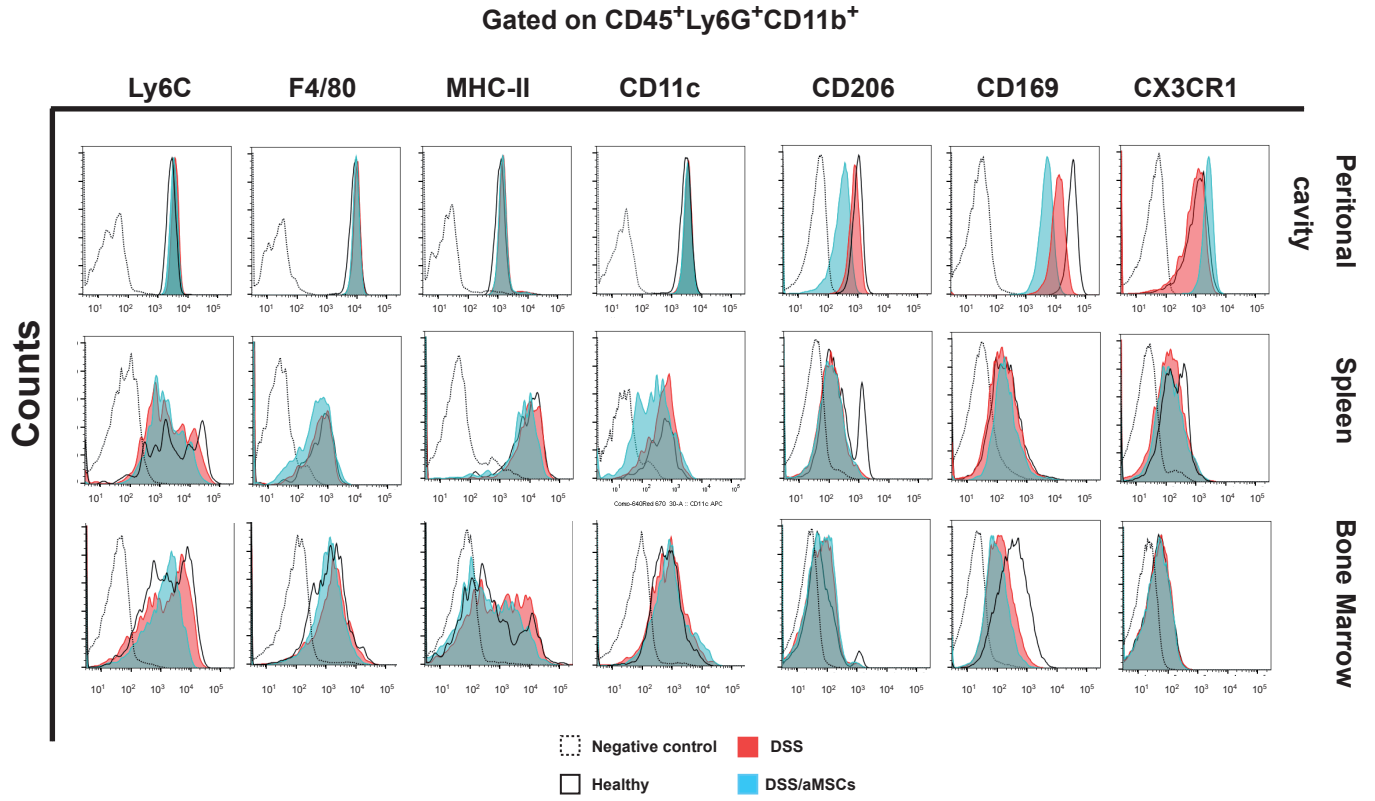

B

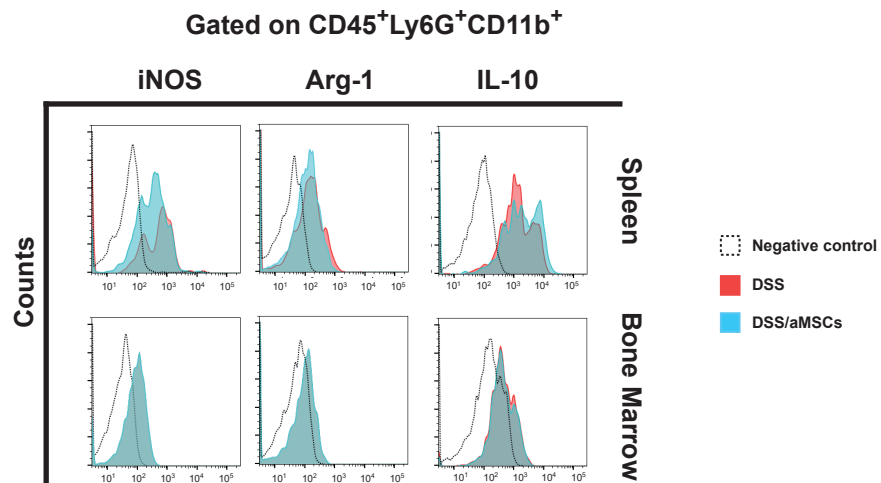

C

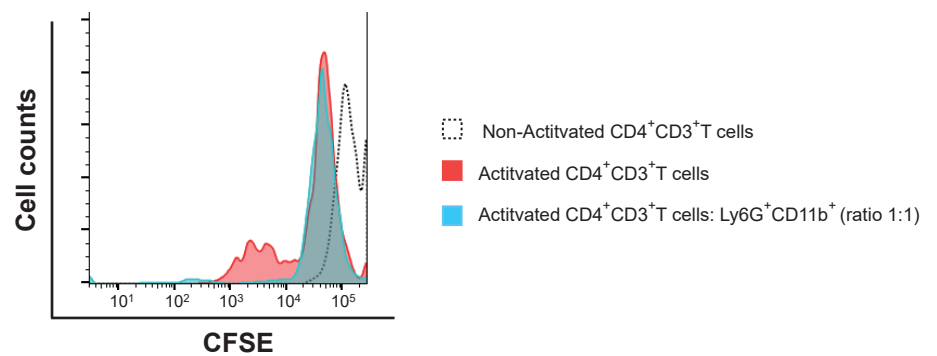

Supplement: jjaa079_suppl_supplementary_figure_4.pdf [file jjaa079_suppl_supplementary_figure_4.pdf]

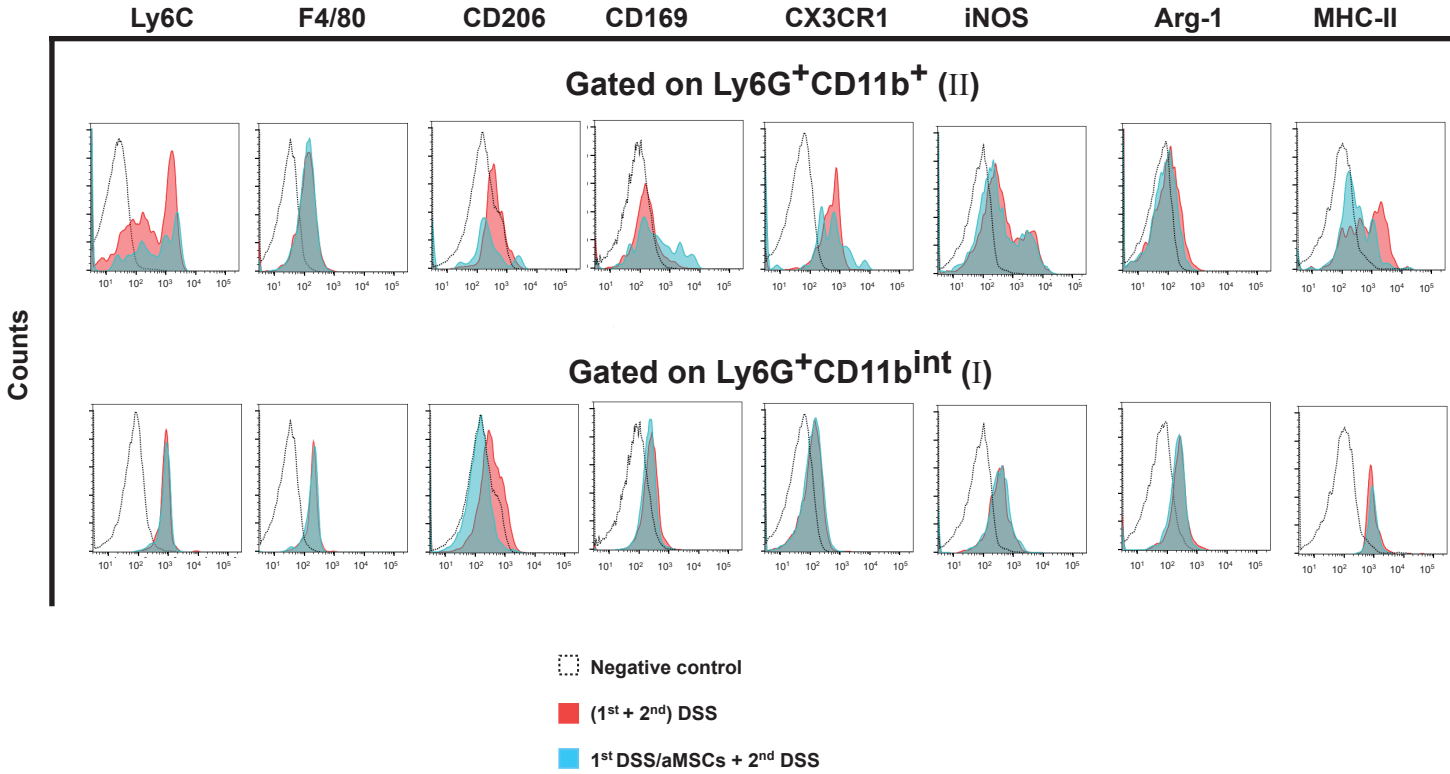

Supplement: jjaa079_suppl_supplementary_figure_5.pdf [file jjaa079_suppl_supplementary_figure_5.pdf]
